# Supplementary material for: Folic acid targeted pH-responsive amphiphilic polymer nanoparticles conjugated with near infrared fluorescence probe for imaging-guided drug delivery
Source: Royal Society of Chemistry journal article supplement (doi:10.1039/c6ra05657a), 2016-01-01
Supplement: c6ra05657a1.pdf [file c6ra05657a1.pdf]

Supporting Information for:

**Folic Acid Targeted pH-Responsive Amphiphilic Polymer Nanoparticles  
Conjugated with Near Infrared Fluorescence Probe for Imaging-guided Drug  
Delivery**

Liyi Fu, Le Liu, Zheng Ruan, Houbing Zhang and Lifeng Yan\*

CAS Key Laboratory of Soft Matter Chemistry, Hefei National Laboratory for  
Physical Sciences at the Microscale, iChEM, University of Science and Technology  
of China. Jinzai Road 96<sup>#</sup>, Hefei, 230026, Anhui, P.R.China. Fax: (+86-551-  
63606853); E-mail: (lfyan@ustc.edu.cn).

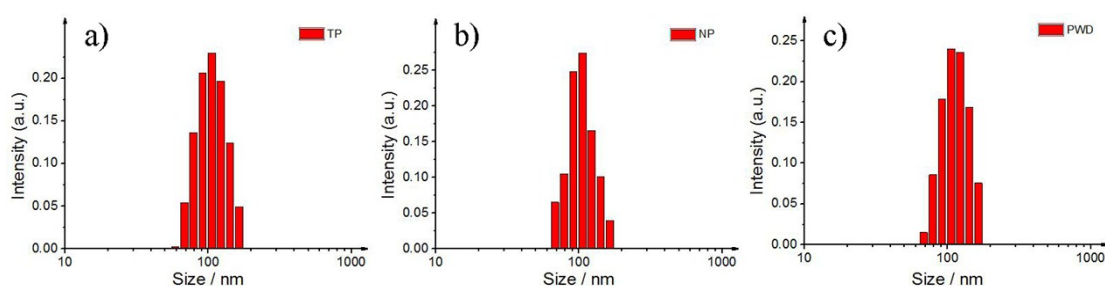

**Figure S1.** Size and Size distribution of TP (a), NP (b) and PWD (c) measured by DLS.

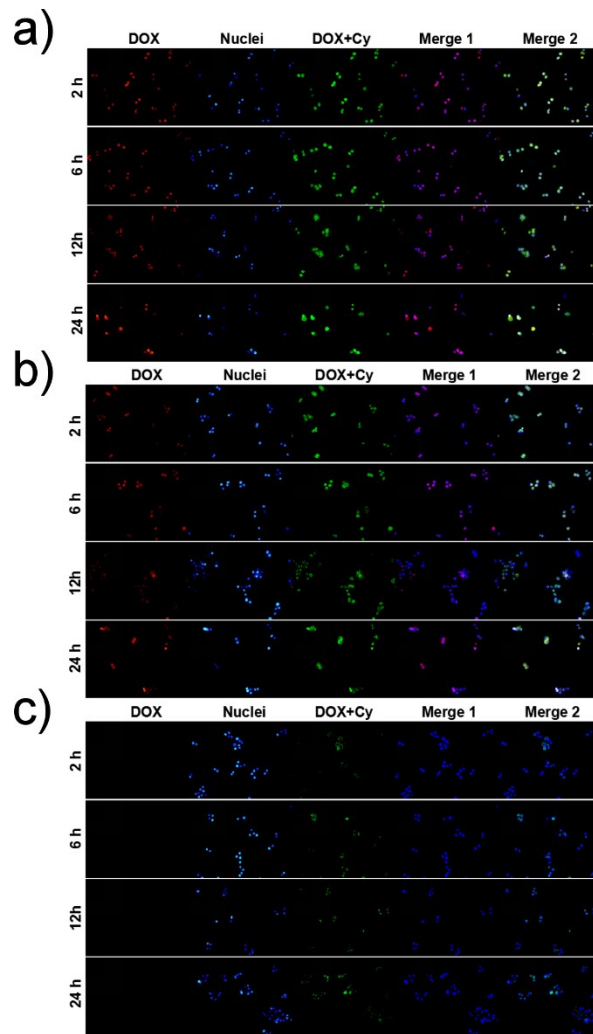

**Figure S2.** Images of fluorescence microscope of HepG2 cells cultivated with (a) TP, (b) NP and (c)PWD for 2 h, 6 h, 12 h and 24 h, respectively.

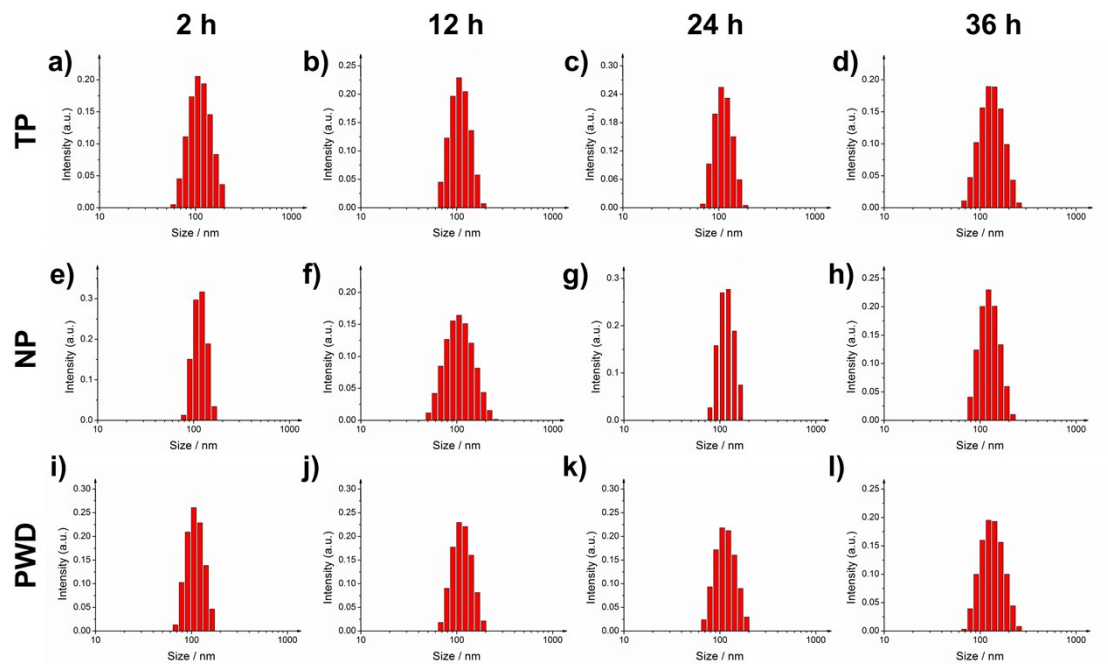

Figure S3. Size and size distribution of TP (a-d), NP (e-h) and PWD (i-l) micelles kept in 10% serum solution for 2 h, 12 h, 24 h, 36 h, respectively, measured by DLS.

Table S1. The diameter (nm) of TP, NP and PWD micelles kept in 10% serum solution for 2 h, 12 h, 24 h, 36 h, respectively.

| Samples | 2 h | 12 h | 24 h | 36 h |
|---------|-----|------|------|------|
| TP      | 115 | 111  | 113  | 136  |
| NP      | 117 | 112  | 119  | 128  |
| PWD     | 111 | 116  | 117  | 137  |
